# Supplementary material for: Phytoplasma classification and phylogeny based on in silico and in vitro RFLP analysis of cpn60 universal target sequences
Source: PubMed Central journal article supplement (PMC5244502; doi:10.1099/ijsem.0.001501), 2016-12
Supplement: ijsem-66-1501-s001.pdf [file ijsem-66-1501-s001.pdf]

## Phytoplasma classification and phylogeny based on *in silico* and *in vitro* RFLP analysis of *cpn60* universal target sequences

Edel Pérez-López<sup>1</sup>, Chrystel Y. Olivier<sup>2</sup>, Mauricio Luna-Rodríguez<sup>3</sup> and Tim J. Dumonceaux<sup>4,5</sup>

1- Instituto de Biotecnología y Ecología Aplicada (INBIOTECA), Universidad Veracruzana, Avenida de Las Culturas Veracruzanas, Xalapa, Veracruz, México.

2- Agriculture and Agri-Food Canada, London Research and Development Centre, London, Ontario, Canada.

3- Laboratorio de Alta Tecnología de Xalapa - DGI, Universidad Veracruzana, Médicos 5, Unidad del Bosque, Xalapa, Veracruz, México.

4- Agriculture and Agri-Food Canada, Saskatoon Research and Development Centre, Saskatoon, Saskatchewan, Canada.

5- Department of Veterinary Microbiology, University of Saskatchewan, Saskatoon, Saskatchewan, Canada.

**Corresponding author:** Tim J. Dumonceaux; **E-mail:** tim.dumonceaux@agr.gc.ca; **Tel:** 1-306-385-9450; **Fax:** 1-306-385-9482

International Journal of Systematic and Evolutionary Microbiology

Supplemental information

A

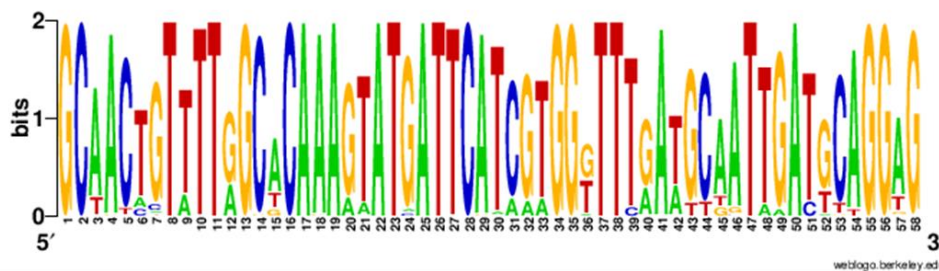

B

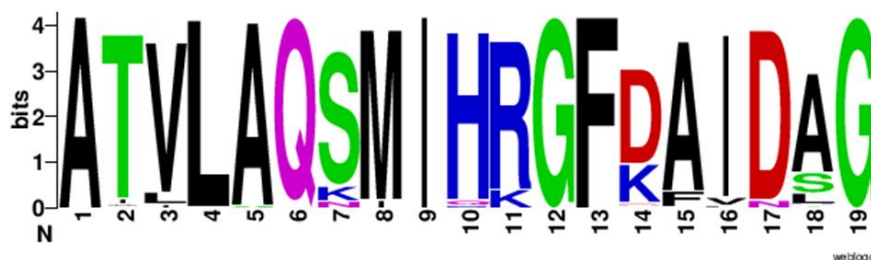

**Fig. S1.** Determination of a phytoplasma “signature” sequence based on the *cpn60* UT. Phytoplasma sequences were compared with related sequences (Fig. 1) using sigoligo (Zahariev *et al.*, 2009), revealing that the first ~60 nucleotides corresponded to a “signature” for phytoplasma sequences. The first 58 nucleotides were aligned and displayed using Weblogo (Crooks *et al.*, 2004) at the nucleotide (A) and amino acid (B) levels to determine a “signature” *cpn60* subsequence for phytoplasmas.

#### References

**Crooks, G. E., Hon, G., Chandonia, J.-M. & Brenner, S. E. (2004).** WebLogo: A Sequence Logo Generator. *Genome Res* **14**, 1188-1190.

**Zahariev, M., Dahl, V., Chen, W. & Levesque, C. A. (2009).** Efficient algorithms for the discovery of DNA oligonucleotide barcodes from sequence databases. *Mol Ecol Resour* **9 Suppl s1**, 58-64.

Table S1. Classification of phytoplasma strains based on RFLP analysis of *cpn60* UT sequences.

| 16Sr group-subgroup | Strain                                                     | Original source | <i>cpn60</i> UT group-subgroup | GenBank accession no./ <i>cpnDB</i> accession no. | Reference                |
|---------------------|------------------------------------------------------------|-----------------|--------------------------------|---------------------------------------------------|--------------------------|
| <b>16SrI</b>        |                                                            |                 |                                |                                                   |                          |
| 16SrI-A             | <i>Brassica</i> spp. Phytoplasma (AY-Ruta) <sup>RS</sup>   | Canada          | <i>cpn60</i> UT I-IA           | KJ940011/ b27094                                  | Dumonceaux et al. (2014) |
| 16SrI-A             | <i>Allium cepa</i> phytoplasma (O2)                        | Canada          | <i>cpn60</i> UT I-IA           | KJ939997/ b27095                                  | Dumonceaux et al. (2014) |
| 16SrI-A             | <i>Allium cepa</i> phytoplasma (O2L)                       | Canada          | <i>cpn60</i> UT I-IA           | KJ939998/ b27096                                  | Dumonceaux et al. (2014) |
| 16SrI-A             | <i>Allium cepa</i> phytoplasma (O2LMB)                     | Canada          | <i>cpn60</i> UT I-IA           | KJ939999/ b27097                                  | Dumonceaux et al. (2014) |
| 16SrI-A             | Ligustrum sinense phytoplasma (PRIVET)                     | Canada          | <i>cpn60</i> UT I-IA           | KJ940009/ b27098                                  | Dumonceaux et al. (2014) |
| 16SrI-A             | <i>Brassica</i> spp. Phytoplasma (AY-Ruta.a)               | Canada          | <i>cpn60</i> UT I-IA           | KJ939986/ b27099                                  | Dumonceaux et al. (2014) |
| 16SrI-A             | Carrot yellows (ca2006/1)                                  | Serbia          | <i>cpn60</i> UT I-IA           | AB599708/ b27100                                  | Mitrović et al. (2011)   |
| 16SrI-A             | Chrysanthemum yellows (CHRYM)                              | Germany         | <i>cpn60</i> UT I-IA           | AB599692/ b27101                                  | Mitrović et al. (2011)   |
| 16SrI-A             | New Jersey aster yellow (NJ-AY)                            | USA             | <i>cpn60</i> UT I-IA           | AB599703/ b27102                                  | Mitrović et al. (2011)   |
| 16SrI-A             | Plantago virescence (PVM)                                  | Germany         | <i>cpn60</i> UT I-IA           | AB599706/ b27103                                  | Mitrović et al. (2011)   |
| 16SrI-A             | Aster yellows witches'-broom phytoplasma (AYWB)            | USA             | <i>cpn60</i> UT I-IA           | NC_007716/b8392                                   | Bai et al. (2006)        |
| 16SrI-A             | Grey dogwood stunt (GD) <sup>RS</sup>                      | USA             | <i>cpn60</i> UT I-IIA          | AB599694/ b27104                                  | Mitrović et al. (2011)   |
| <b>16SrB</b>        |                                                            |                 |                                |                                                   |                          |
| 16SrI-B             | <i>Linum usitatissimum</i> phytoplasma (SF1) <sup>RS</sup> | Canada          | <i>cpn60</i> UT I-IB           | KJ940013/ b27105                                  | Dumonceaux et al. (2014) |
| 16SrI-B             | <i>Linum usitatissimum</i> phytoplasma (SF2)               | Canada          | <i>cpn60</i> UT I-IB           | KJ940014/ b27106                                  | Dumonceaux et al. (2014) |
| 16SrI-B             | <i>Linum usitatissimum</i> phytoplasma (SF3)               | Canada          | <i>cpn60</i> UT I-IB           | KJ940015/ b27107                                  | Dumonceaux et al. (2014) |
| 16SrI-B             | <i>Linum usitatissimum</i> phytoplasma (SF4)               | Canada          | <i>cpn60</i> UT I-IB           | KJ940016/ b27108                                  | Dumonceaux et al. (2014) |
| 16SrI-B             | <i>Thlapsi arvense</i> phytoplasma (SWR1)                  | Canada          | <i>cpn60</i> UT I-IB           | KJ940017/ b27109                                  | Dumonceaux et al. (2014) |
| 16SrI-B             | <i>Thlapsi arvense</i> phytoplasma (SWR2)                  | Canada          | <i>cpn60</i> UT I-IB           | KJ940018/ b27110                                  | Dumonceaux et al. (2014) |
| 16SrI-B             | Periwinkle aster yellow (P-AY)                             | Canada          | <i>cpn60</i> UT I-IB           | KJ940004/ b27111                                  | Dumonceaux et al. (2014) |
| 16SrI-B             | Apricot atypical aster yellow (AVUT)                       | Germany         | <i>cpn60</i> UT I-IB           | AB599686/ b27112                                  | Mitrović et al. (2011)   |
| 16SrI-B             | Aster yellow (AY-27)                                       | Canada          | <i>cpn60</i> UT I-IB           | AB599688/ b27113                                  | Mitrović et al. (2011)   |
| 16SrI-B             | Aster yellow (A2192)                                       | Germany         | <i>cpn60</i> UT I-IB           | AB599687/ b27114                                  | Mitrović et al. (2011)   |
| 16SrI-B             | Primrose virescence (PRIVA)                                | Germany         | <i>cpn60</i> UT I-IB           | AB599705/ b27115                                  | Mitrović et al. (2011)   |
| 16SrI-B             | Diploxaxis virescence (DIV)                                | Spain           | <i>cpn60</i> UT I-IB           | AB599693/ b27116                                  | Mitrović et al. (2011)   |
| 16SrI-B             | Primula green yellows (PrG)                                | UK              | <i>cpn60</i> UT I-IB           | AB599696/ b27117                                  | Mitrović et al. (2011)   |
| 16SrI-B             | Oilseed rape virescence (RV)                               | France          | <i>cpn60</i> UT I-IB           | AB599698/ b27118                                  | Mitrović et al. (2011)   |
| 16SrI-B             | Gladiolus witches' broom (GLAWC)                           | Netherlands     | <i>cpn60</i> UT I-IB           | AB599700/ b27119                                  | Mitrović et al. (2011)   |
| 16SrI-B             | Periwinkle virescence (NA)                                 | Italy           | <i>cpn60</i> UT I-IB           | AB599702/ b27120                                  | Mitrović et al. (2011)   |
| 16SrI-B             | Western aster yellows (SAY)                                | California      | <i>cpn60</i> UT I-IB           | AB599707/ b27121                                  | Mitrović et al. (2011)   |
| 16SrI-B             | Mulberry dwarf phytoplasma (MD)                            | Japan           | <i>cpn60</i> UT I-IB           | AB124809/ b27122                                  | Kakizawa et al. (2006)   |
| 16SrI-B             | Onion yellows phytoplasma (OY-W)                           | Japan           | <i>cpn60</i> UT I-IB           | AB124806/ b27123                                  | Kakizawa et al. (2006)   |
| 16SrI-B             | Onion yellows phytoplasma (OY-M)                           | Japan           | <i>cpn60</i> UT I-IB           | AB124807/ b27124                                  | Kakizawa et al. (2006)   |
| 16SrI-B             | Onion yellows phytoplasma (OY-NIM)                         | Japan           | <i>cpn60</i> UT I-IB           | AB124808/ b27125                                  | Kakizawa et al. (2006)   |
| 16SrI-B             | Paulownia witches'-broom phytoplasma (PaWB)                | Taiwan          | <i>cpn60</i> UT I-IB           | AB124810/ b27126                                  | Kakizawa et al. (2006)   |

|         |                                                        |          |                        |                   |                            |
|---------|--------------------------------------------------------|----------|------------------------|-------------------|----------------------------|
| 16SrI-B | Sumac witches'-broom phytoplasma (SuWB)                | Japan    | <i>cpn60</i> UT I-IB   | AB242236/ b27127  | Kakizawa et al. (2006)     |
| 16SrI-B | Porcelain vine witches'-broom (PvWB)                   | Korea    | <i>cpn60</i> UT I-IB   | AB242237/ b27128  | Kakizawa et al. (2006)     |
| 16SrI-B | Onion yellows phytoplasma (OY-M)                       | Japan    | <i>cpn60</i> UT I-IB   | NC_005303/ b27129 | Oshima et al. (2004)       |
| 16SrI-B | Carrot yellows phytoplasma (ca2006/9)                  | Serbia   | <i>cpn60</i> UT I-IB   | AB599709/ b27130  | Mitrović et al. (2011)     |
| 16SrI-B | American aster yellows phytoplasma (AY-W)              | USA      | <i>cpn60</i> UT I-IB   | AB599691/ b27131  | Mitrović et al. (2011)     |
| 16SrI-B | Hydrangea phyllody phytoplasma (HP)                    | Japan    | <i>cpn60</i> UT I-IB   | AB738737/ b27132  | Takinami et al. (2013)     |
| 16SrI-B | Aster yellows phytoplasma (AY-J) <sup>RS</sup>         | France   | <i>cpn60</i> UT I-IIB  | AB599689/ b27133  | Mitrović et al. (2011)     |
| 16SrI-B | Carrot yellows phytoplasma (ca2006/5)                  | Serbia   | <i>cpn60</i> UT I-IIB  | AB599711/ b27134  | Mitrović et al. (2011)     |
| 16SrI-B | Maize bushy stunt phytoplasma (MBS-Ver) <sup>RS</sup>  | Mexico   | <i>cpn60</i> UT I-IIIB | KT444673/ b27135  | Pérez-López et al. (2016a) |
| 16SrI-B | Maize bushy stunt phytoplasma (MBS-Col)                | Colombia | <i>cpn60</i> UT I-IIIB | AB599712/ b27136  | Mitrović et al. (2011)     |
| 16SrI-B | Lethal wilt oil palm phytoplasma (OP47)                | Colombia | <i>cpn60</i> UT I-IIIB | JX681023/ b27137  | Alvarez et al. (2014)      |
| 16SrI-B | Mexican periwinkle proliferation (MePP-Centre)         | Mexico   | <i>cpn60</i> UT I-IIIB | KU145529/b27186   | Unpublished                |
| 16SrI-B | Mexican periwinkle proliferation (MePP-South)          | Mexico   | <i>cpn60</i> UT I-IIIB | KU145530/b27187   | Unpublished                |
| 16SrI-B | Maize bushy stunt phytoplasma (MBS-Pueb) <sup>RS</sup> | Mexico   | <i>cpn60</i> UT I-IVB  | KT444672/ b27138  | Pérez-López et al. (2016a) |
| 16SrI-B | Iceland poppy yellows phytoplasma (IPY) <sup>RS</sup>  | Japan    | <i>cpn60</i> UT I-VB   | AB242234/ b27139  | Kakizawa et al. (2006)     |
| 16SrI-B | Marguerite yellows phytoplasma (MarY)                  | Japan    | <i>cpn60</i> UT I-VB   | AB242235/ b27140  | Kakizawa et al. (2006)     |
| 16SrI-B | Eggplant dwarf phytoplasma (ED) <sup>RS</sup>          | Japan    | <i>cpn60</i> UT I-VIB  | AB242231/ b27141  | Kakizawa et al. (2006)     |
| 16SrI-B | Tomato yellows phytoplasma (TY)                        | Japan    | <i>cpn60</i> UT I-VIB  | AB242232/ b27142  | Kakizawa et al. (2006)     |
| 16SrI-B | Lettuce yellows phytoplasma (LY)                       | Japan    | <i>cpn60</i> UT I-VIB  | AB242233/ b27143  | Kakizawa et al. (2006)     |
| 16SrI-C | Aster yellows phytoplasma (AY-Col) <sup>RS</sup>       | Italy    | <i>cpn60</i> UT I-IC   | KJ939994/ b27144  | Dumonceaux et al. (2014)   |
| 16SrI-C | Aster yellows phytoplasma (CVB)                        | Italy    | <i>cpn60</i> UT I-IC   | KJ939995/ b27145  | Dumonceaux et al. (2014)   |
| 16SrI-C | Carrot yellows phytoplasma (CA)                        | Italy    | <i>cpn60</i> UT I-IC   | AB599690/ b27146  | Mitrović et al. (2011)     |
| 16SrI-C | Leontodon yellows phytoplasma (LEO)                    | Italy    | <i>cpn60</i> UT I-IC   | AB599701/ b27147  | Mitrović et al. (2011)     |
| 16SrI-C | Clover phyllody phytoplasma (KVF)                      | France   | <i>cpn60</i> UT I-IC   | AB599695/ b27148  | Mitrović et al. (2011)     |
| 16SrI-C | Potato purple top (PPT)                                | France   | <i>cpn60</i> UT I-IC   | AB599704/b27149   | Mitrović et al. (2011)     |
| 16SrI-E | Blueberry stunt phytoplasma (BbSP) <sup>RS</sup>       | Canada   | <i>cpn60</i> UT I-IE   | KU523402/ b27454  | Unpublished                |

|                |                                                                         |         |                        |                                    |                                                     |
|----------------|-------------------------------------------------------------------------|---------|------------------------|------------------------------------|-----------------------------------------------------|
| 16SrI-F        | Apricot chlorotic leafroll (AY-A) <sup>RS</sup>                         | Spain   | <i>cpn60</i> UT I-IF   | AB599699/b27150                    | Mitrović et al. (2011)                              |
| 16SrI-P        | Populus decline phytoplasma (PopD) <sup>RS</sup>                        | Serbia  | <i>cpn60</i> UT I-IP   | AB599710/b27151                    | Mitrović et al. (2011)                              |
| <b>16SrII</b>  |                                                                         |         |                        |                                    |                                                     |
| 16SrII-A       | Peanut witches broom (PhWB) <sup>RS</sup>                               | Taiwan  | <i>cpn60</i> UT II-IA  | NZ_AM<br>WZ0000<br>0000/b27<br>152 | Wan-Chia et al. (2013)                              |
| <b>16SrV</b>   |                                                                         |         |                        |                                    |                                                     |
| 16SrV-A        | Flavescence dorée phytoplasma (FD) <sup>RS</sup>                        | France  | <i>cpn60</i> UT V-IA   | KJ939992/b27153                    | Dumonceaux et al. (2014)                            |
| 16SrV-A        | Palatinate grapevine yellows phytoplasma (PGY)                          | Germany | <i>cpn60</i> UT V-IA   | KJ939991/b27154                    | Dumonceaux et al. (2014)                            |
| 16SrV-A        | Rubus stunt phytoplasma (RS)                                            | Germany | <i>cpn60</i> UT V-IA   | KJ939990/b27155                    | Dumonceaux et al. (2014)                            |
| <b>16SrVII</b> |                                                                         |         |                        |                                    |                                                     |
| 16SrVII-A      | Ash yellows phytoplasma (AshY) <sup>RS</sup>                            | France  | <i>cpn60</i> UT VII-IA | KJ939978/b27156                    | Dumonceaux et al. (2014)                            |
| <b>16SrIX</b>  |                                                                         |         |                        |                                    |                                                     |
| 16SrIX-B       | Almond witches'-broom SA213                                             | Lebanon | <i>cpn60</i> UT IX-IB  | KND62606/b27157                    | Quaglino et al. (2015)                              |
| 16SrIX-H       | <i>Catharanthus roseus</i> 's phoenicium phytoplasma (Cr) <sup>RS</sup> | Cuba    | <i>cpn60</i> UT IX-IH  | KJ939989/ b27158                   | Dumonceaux et al. (2014); Pérez-López et al. (2014) |
| <b>16SrX</b>   |                                                                         |         |                        |                                    |                                                     |
| 16SrX-A        | Apple proliferation phytoplasma (AP) <sup>RS</sup>                      | Germany | <i>cpn60</i> UT X-IA   | KJ939977/ b27159                   | Dumonceaux et al. (2014)                            |
| 16SrX-A        | Apple proliferation phytoplasma (AT)                                    | Germany | <i>cpn60</i> UT X-IA   | NC_011047/ b27160                  | Kube et al. (2008)                                  |
| 16SrX-C        | Pear decline phytoplasma (12MG305) <sup>RS</sup>                        | Canada  | <i>cpn60</i> UT X-IC   | KJ940000/b27161                    | Dumonceaux et al. (2014)                            |
| 16SrX-C        | Pear decline phytoplasma (12MG316)                                      | USA     | <i>cpn60</i> UT X-IC   | KJ940001/ b27162                   | Dumonceaux et al. (2014)                            |
| 16SrX-C        | Pear decline phytoplasma (PD2)                                          | Germany | <i>cpn60</i> UT X-IC   | KJ940002/ b27163                   | Dumonceaux et al. (2014)                            |

|                 |                                                               |           |                        |                   |                           |
|-----------------|---------------------------------------------------------------|-----------|------------------------|-------------------|---------------------------|
| 16SrX-C         | Pear decline phytoplasma (PD INRA)                            | France    | <i>cpn60</i> UT X-IC   | KJ940003/ b27164  | Dumonceaux et al. (2014)  |
| 16SrX-C         | Peach yellow leaf roll phytoplasma (PYLR)                     | USA       | <i>cpn60</i> UT X-IC   | KJ940010/ b27165  | Dumonceaux et al. (2014)  |
| 16SrX-F         | European stone fruit yellows phytoplasma (ESFY) <sup>RS</sup> | Italy     | <i>cpn60</i> UT X-IF   | KJ940007/ b27166  | Dumonceaux et al. (2014)  |
| 16SrX-F         | European stone fruit yellows phytoplasma (ESFY-INRA)          | Italy     | <i>cpn60</i> UT X-IF   | KJ939975/ b27167  | Dumonceaux et al. (2014)  |
| <b>16SrXII</b>  |                                                               |           |                        |                   |                           |
| 16SrXII-A       | Bois noir phytoplasma (BN44948) <sup>RS</sup>                 | Germany   | <i>cpn60</i> UT XII-IA | KJ939979/ b27168  | Dumonceaux et al. (2014)  |
| 16SrXII-A       | Bois noir phytoplasma (BN44962)                               | Germany   | <i>cpn60</i> UT XII-IA | KJ939980/ b27169  | Dumonceaux et al. (2014)  |
| 16SrXII-A       | Bois noir phytoplasma (BN45660)                               | Germany   | <i>cpn60</i> UT XII-IA | KJ939981/ b27170  | Dumonceaux et al. (2014)  |
| 16SrXII-A       | Bois noir phytoplasma (BN46017)                               | Germany   | <i>cpn60</i> UT XII-IA | KJ939982/ b27171  | Dumonceaux et al. (2014)  |
| 16SrXII-A       | Bois noir phytoplasma (BN Lebanon)                            | Lebanon   | <i>cpn60</i> UT XII-IA | KJ939993/ b27172  | Dumonceaux et al. (2014)  |
| 16SrXII-A       | Bois noir phytoplasma (BN France)                             | France    | <i>cpn60</i> UT XII-IA | KJ940008/ b27173  | Dumonceaux et al. (2014)  |
| 16SrXII-A       | Bois noir phytoplasma (BN Germany)                            | Germany   | <i>cpn60</i> UT XII-IA | KJ940006/ b27174  | Dumonceaux et al. (2014)  |
| 16SrXII-A       | Bois noir phytoplasma (Stol BN)                               | France    | <i>cpn60</i> UT XII-IA | KJ940005/ b27175  | Dumonceaux et al. (2014)  |
| 16SrXII-B       | Cottonbush witchets broom (CBWB)                              | Australia | <i>cpn60</i> UT XII-IB | NC_010544/ b27176 | Tran-Nguyen et al. (2008) |
| 16SrXII-B       | Strawberry lethal yellows phytoplasma (SLY) <sup>RS</sup>     | Australia | <i>cpn60</i> UT XII-IB | NC_021236/ b27177 | Andersen et al. (2013)    |
| <b>16SrXIII</b> |                                                               |           |                        |                   |                           |

|                |                                                        |         |                         |                  |                        |
|----------------|--------------------------------------------------------|---------|-------------------------|------------------|------------------------|
| 16SrXIII-A     | Mexican periwinkle virescence (MPV-S83) <sup>RS</sup>  | Mexico  | <i>cpn60</i> UT XIII-IA | KT444662/ b27178 | Unpublished            |
| 16SrXIII-A     | Mexican periwinkle virescence (MPV-S86)                | Mexico  | <i>cpn60</i> UT XIII-IA | KT444669/ b27179 | Unpublished            |
| <b>16SrXIV</b> |                                                        |         |                         |                  |                        |
| 16SrXIV-A      | Bermuda white leaf phytoplasma (AL85/11) <sup>RS</sup> | Albania | <i>cpn60</i> UT XIV-IA  | KF383984/ b27180 | Mitrović et al. (2015) |
| 16SrXIV-A      | Bermuda white leaf phytoplasma (IT35/12)               | Italy   | <i>cpn60</i> UT XIV-IA  | KF383982/ b27181 | Mitrović et al. (2015) |
| 16SrXIV-A      | Bermuda white leaf phytoplasma (IT71/10)               | Italy   | <i>cpn60</i> UT XIV-IA  | KF383983/ b27182 | Mitrović et al. (2015) |
| 16SrXIV-C      | Bermuda white leaf phytoplasma (RS59/11) <sup>RS</sup> | Serbia  | <i>cpn60</i> UT XIV-IC  | KF383985/ b27183 | Mitrović et al. (2015) |
| 16SrXIV-C      | Bermuda white leaf phytoplasma (RS123/13)              | Serbia  | <i>cpn60</i> UT XIV-IC  | KJ000022/ b27184 | Mitrović et al. (2015) |
| 16SrXIV-C      | Bermuda white leaf phytoplasma (RS306/13)              | Serbia  | <i>cpn60</i> UT XIV-IC  | KJ000023/ b27185 | Mitrović et al. (2015) |
